# Supplementary material
Source: publisher figshare collection journal article supplement (https://sage.figshare.com/ndownloader/files/14802098)
Supplement: Supplementary file 1 [file 14802098]

**Supplementary Appendix**

| Table 3. Supplementary Cox Proportional Hazard Regression Predicting Time-to-Plea. | | | |
| --- | --- | --- | --- |
| Model # | (1) | (2) | (3) |
|  | Main model | Without pending cases | With trials |
|  | HR (SE) | HR (SE) | HR (SE) |
| **Case characteristics:** |  |  |  |
| Pretrial detained | 2.86*** (0.11) | 2.45*** (0.09) | 2.75*** (0.10) |
| Multiple arrest charges | 0.98 (0.04) | 0.96 (0.03) | 0.97 (0.04) |
| Criminal history factor score | 0.99 (0.01) | 0.98* (0.01) | 0.99 (0.01) |
| Property crime | 1.85*** (0.06) | 1.70*** (0.05) | 1.93*** (0.06) |
| Drug crime | 1.74*** (0.08) | 1.62*** (0.08) | 1.82*** (0.08) |
| Public order crime | 1.84*** (0.08) | 1.68*** (0.06) | 1.91*** (0.08) |
| **Defendant demographics:** |  |  |  |
| Age | 1.00 (0.00) | 1.00 (0.00) | 1.00* (0.00) |
| Male | 0.88*** (0.02) | 0.90*** (0.02) | 0.87*** (0.02) |
| Black | 0.96 (0.03) | 0.98 (0.03) | 0.95 (0.03) |
| Hispanic | 1.02 (0.03) | 1.05 (0.03) | 1.03 (0.03) |
| **Social contextual factors:** |  |  |  |
| Log case rate | 0.84* (0.07) | 0.91 (0.06) | 0.86 (0.07) |
| Log % jail capacity used | 0.62*** (0.08) | 0.66*** (0.08) | 0.61*** (0.08) |
| Log per capita prosecutor  expenditure | 1.11* (0.05) | 1.10* (0.05) | 1.12* (0.06) |
| Log crime rate | 1.14 (0.09) | 1.06 (0.07) | 1.12 (0.09) |
| Log percent black | 0.84** (0.05) | 0.88** (0.04) | 0.84** (0.05) |
| Log percent Latino | 1.04 (0.05) | 1.05 (0.05) | 1.04 (0.05) |
| Log Population | 1.04 (0.06) | 1.05 (0.05) | 1.04 (0.07) |
| South | 0.83 (0.09) | 0.86 (0.08) | 0.83 (0.09) |
| Observations | 107497 | 93951 | 112515 |
| HR = Hazard ratio; Standard errors clustered by county in parentheses.  *NOTES*: Model 1 represents the primary survival analysis from Table 2, and is included here to aid comparisons with supplementary Models 2-3. Model 2 excludes pending cases, while Model 3 includes trials. Reference groups = released pretrial, single arrest charge, violent offense charge, female defendant, white defendant, county in non-southern state. Annual fixed-effects included, but not shown here.  * p < .05, ** p < .01, *** p < .001 | | | |
